# Supplementary material for: A copula method for modeling directional dependence of genes
Source: Springer Nature journal article supplement (doi:10.1186/1471-2105-9-225), 2008-05-01
Supplement: Additional file 2 [file 1471-2105-9-225-s2.pdf]

| Interacting genes (locus name) | Our Method | PathwayAssist | Chen's method |
|--------------------------------|------------|---------------|---------------|
| POL30(YBR088C)-CLB6(YGR109C)   | O          | ×             | ×             |
| POL30(YBR088C)-PRI2(YKL045W)   | O          | ×             | ×             |
| POL30(YBR088C)-POL12(YBL035C)  | O          | ×             | ×             |
| POL30(YBR088C)-PRI1(YIR008C)   | O          | ×             | ×             |
| POL30(YBR088C)-RAD53(YPL153C)  | O          | ×             | ×             |
| POL30(YBR088C)-CLB5(YPR120C)   | O          | ×             | O             |
| POL30(YBR088C)-MCD1(YDL003W)   | O          | O             | O             |
| POL30(YBR088C)-MSH2(YOL090W)   | O          | ×             | ×             |
| POL30(YBR088C)-RFA3(YJL173C)   | O          | ×             | ×             |
| POL30(YBR088C)-MSH6(YDR097C)   | O          | ×             | ×             |
| POL30(YBR088C)-CDC45(YLR103C)  | O          | ×             | ×             |
| POL30(YBR088C)-PMS1(YNL082W)   | O          | ×             | ×             |
| POL30(YBR088C)-PDS1(YDR113C)   | O          | ×             | ×             |
| POL30(YBR088C)-POL1(YNL102W)   | O          | ×             | O             |
| POL30(YBR088C)-ASF1(YJL115W)   | O          | ×             | ×             |
| POL30(YBR088C)-RAD54(YGL163C)  | O          | ×             | ×             |
| POL30(YBR088C)-POL2(YNL262W)   | O          | ×             | ×             |
| POL30(YBR088C)-HPR5(YJL092W)   | O          | ×             | ×             |
| MCD1(YDL003W)-CLB6(YGR109C)    | O          | ×             | ×             |
| MCD1(YDL003W)-PRI2(YKL045W)    | O          | ×             | O             |
| MCD1(YDL003W)-POL12(YBL035C)   | O          | ×             | ×             |
| MCD1(YDL003W)-PRI1(YIR008C)    | O          | ×             | ×             |
| MCD1(YDL003W)-RAD53(YPL153C)   | O          | ×             | ×             |
| MCD1(YDL003W)-CLB5(YPR120C)    | O          | ×             | ×             |
| MCD1(YDL003W)-MSH2(YOL090W)    | O          | ×             | O             |
| MCD1(YDL003W)-RFA3(YJL173C)    | O          | ×             | ×             |
| MCD1(YDL003W)-MSH6(YDR097C)    | O          | ×             | ×             |
| MCD1(YDL003W)-CDC45(YLR103C)   | O          | ×             | O             |
| MCD1(YDL003W)-PMS1(YNL082W)    | O          | ×             | O             |
| MCD1(YDL003W)-PDS1(YDR113C)    | O          | ×             | ×             |
| MCD1(YDL003W)-POL1(YNL102W)    | O          | ×             | ×             |
| MCD1(YDL003W)-ASF1(YJL115W)    | O          | ×             | O             |
| MCD1(YDL003W)-RAD54(YGL163C)   | O          | ×             | ×             |
| MCD1(YDL003W)-POL2(YNL262W)    | O          | ×             | ×             |
| MCD1(YDL003W)-HPR5(YJL092W)    | O          | ×             | ×             |
| PRI2(YKL045W)-CLB6(YGR109C)    | O          | ×             | ×             |
| PRI2(YKL045W)-POL12(YBL035C)   | O          | O             | O             |

| Interacting genes (locus name) | Our Method | PathwayAssist | Chen's method |
|--------------------------------|------------|---------------|---------------|
| PRI2(YKL045W)-PRI1(YIR008C)    | O          | ×             | ×             |
| PRI2(YKL045W)-RAD53(YPL153C)   | O          | ×             | ×             |
| PRI2(YKL045W)-MSH2(YOL090W)    | O          | ×             | ×             |
| PRI2(YKL045W)-RFA3(YJL173C)    | O          | ×             | ×             |
| PRI2(YKL045W)-MSH6(YDR097C)    | O          | ×             | O             |
| PRI2(YKL045W)-CDC45(YLR103C)   | O          | ×             | ×             |
| PRI2(YKL045W)-PMS1(YNL082W)    | O          | ×             | ×             |
| PRI2(YKL045W)-PDS1(YDR113C)    | O          | ×             | ×             |
| PRI2(YKL045W)-POL1(YNL102W)    | O          | ×             | ×             |
| PRI2(YKL045W)-ASF1(YJL115W)    | O          | ×             | O             |
| PRI2(YKL045W)-RAD54(YGL163C)   | O          | ×             | ×             |
| PRI2(YKL045W)-POL2(YNL262W)    | O          | ×             | ×             |
| PRI2(YKL045W)-HPR5(YJL092W)    | O          | ×             | ×             |
| PRI2(YKL045W)-CLB5(YPR120C)    | O          | ×             | ×             |
| POL1(YNL102W)-CLB6(YGR109C)    | O          | ×             | ×             |
| POL1(YNL102W)-POL12(YBL035C)   | O          | ×             | ×             |
| POL1(YNL102W)-PRI1(YIR008C)    | O          | ×             | ×             |
| POL1(YNL102W)-RAD53(YPL153C)   | O          | ×             | ×             |
| POL1(YNL102W)-MSH2(YOL090W)    | O          | ×             | O             |
| POL1(YNL102W)-RFA3(YJL173C)    | O          | ×             | ×             |
| POL1(YNL102W)-MSH6(YDR097C)    | O          | ×             | ×             |
| POL1(YNL102W)-CDC45(YLR103C)   | O          | ×             | O             |
| POL1(YNL102W)-PMS1(YNL082W)    | O          | ×             | ×             |
| POL1(YNL102W)-PDS1(YDR113C)    | O          | ×             | ×             |
| POL1(YNL102W)-ASF1(YJL115W)    | O          | ×             | O             |
| POL1(YNL102W)-RAD54(YGL163C)   | O          | ×             | ×             |
| POL1(YNL102W)-POL2(YNL262W)    | O          | ×             | ×             |
| POL1(YNL102W)-HPR5(YJL092W)    | O          | ×             | ×             |
| POL1(YNL102W)-CLB5(YPR120C)    | O          | ×             | ×             |
| MSH2(YOL090W)-CLB6(YGR109C)    | O          | ×             | ×             |
| MSH2(YOL090W)-POL12(YBL035C)   | O          | ×             | ×             |
| MSH2(YOL090W)-PRI1(YIR008C)    | O          | ×             | O             |
| MSH2(YOL090W)-RAD53(YPL153C)   | O          | ×             | ×             |
| MSH2(YOL090W)-RFA3(YJL173C)    | O          | O             | O             |
| MSH2(YOL090W)-MSH6(YDR097C)    | O          | O             | O             |
| MSH2(YOL090W)-CDC45(YLR103C)   | O          | ×             | ×             |
| MSH2(YOL090W)-PMS1(YNL082W)    | O          | ×             | ×             |

| Interacting genes (locus name) | Our Method | PathwayAssist | Chen's method |
|--------------------------------|------------|---------------|---------------|
| MSH2(YOL090W)-PDS1(YDR113C)    | O          | ×             | O             |
| MSH2(YOL090W)-ASF1(YJL115W)    | O          | ×             | ×             |
| MSH2(YOL090W)-RAD54(YGL163C)   | O          | ×             | ×             |
| MSH2(YOL090W)-POL2(YNL262W)    | O          | ×             | ×             |
| MSH2(YOL090W)-HPR5(YJL092W)    | O          | ×             | ×             |
| MSH2(YOL090W)-CLB5(YPR120C)    | O          | ×             | ×             |
| POL12(YBL035C)-CLB6(YGR109C)   | O          | ×             | ×             |
| POL12(YBL035C)-PRI1(YIR008C)   | O          | ×             | ×             |
| POL12(YBL035C)-RAD53(YPL153C)  | O          | ×             | O             |
| POL12(YBL035C)-RFA3(YJL173C)   | O          | ×             | ×             |
| POL12(YBL035C)-MSH6(YDR097C)   | O          | ×             | ×             |
| POL12(YBL035C)-CDC45(YLR103C)  | O          | ×             | O             |
| POL12(YBL035C)-PMS1(YNL082W)   | O          | ×             | ×             |
| POL12(YBL035C)-PDS1(YDR113C)   | O          | ×             | ×             |
| POL12(YBL035C)-ASF1(YJL115W)   | O          | ×             | ×             |
| POL12(YBL035C)-RAD54(YGL163C)  | O          | ×             | ×             |
| POL12(YBL035C)-POL2(YNL262W)   | O          | ×             | ×             |
| POL12(YBL035C)-HPR5(YJL092W)   | O          | ×             | ×             |
| POL12(YBL035C)-CLB5(YPR120C)   | O          | ×             | ×             |
| ASF1(YJL115W)-CLB6(YGR109C)    | O          | ×             | ×             |
| ASF1(YJL115W)-PRI1(YIR008C)    | O          | ×             | ×             |
| ASF1(YJL115W)-RAD53(YPL153C)   | O          | ×             | ×             |
| ASF1(YJL115W)-RFA3(YJL173C)    | O          | ×             | ×             |
| ASF1(YJL115W)-MSH6(YDR097C)    | O          | ×             | O             |
| ASF1(YJL115W)-CDC45(YLR103C)   | O          | ×             | ×             |
| ASF1(YJL115W)-PMS1(YNL082W)    | O          | ×             | ×             |
| ASF1(YJL115W)-PDS1(YDR113C)    | O          | ×             | ×             |
| ASF1(YJL115W)-RAD54(YGL163C)   | O          | ×             | O             |
| ASF1(YJL115W)-POL2(YNL262W)    | O          | ×             | ×             |
| ASF1(YJL115W)-HPR5(YJL092W)    | O          | ×             | ×             |
| ASF1(YJL115W)-CLB5(YPR120C)    | O          | ×             | ×             |
| PRI1(YIR008C)-CLB6(YGR109C)    | O          | ×             | ×             |
| PRI1(YIR008C)-RAD53(YPL153C)   | O          | O             | O             |
| PRI1(YIR008C)-RFA3(YJL173C)    | O          | ×             | O             |
| PRI1(YIR008C)-MSH6(YDR097C)    | O          | ×             | ×             |
| PRI1(YIR008C)-CDC45(YLR103C)   | O          | ×             | ×             |
| PRI1(YIR008C)-PMS1(YNL082W)    | O          | ×             | ×             |

| Interacting genes (locus name) | Our Method | PathwayAssist | Chen's method |
|--------------------------------|------------|---------------|---------------|
| PRI1(YIR008C)-PDS1(YDR113C)    | O          | ×             | O             |
| PRI1(YIR008C)-RAD54(YGL163C)   | O          | ×             | ×             |
| PRI1(YIR008C)-POL2(YNL262W)    | O          | ×             | ×             |
| PRI1(YIR008C)-HPR5(YJL092W)    | O          | ×             | ×             |
| PRI1(YIR008C)-CLB5(YPR120C)    | O          | ×             | ×             |
| RFA3(YJL173C)-CLB6(YGR109C)    | O          | ×             | ×             |
| RFA3(YJL173C)-RAD53(YPL153C)   | O          | ×             | ×             |
| RFA3(YJL173C)-MSH6(YDR097C)    | O          | O             | O             |
| RFA3(YJL173C)-CDC45(YLR103C)   | O          | ×             | ×             |
| RFA3(YJL173C)-PMS1(YNL082W)    | O          | ×             | ×             |
| RFA3(YJL173C)-PDS1(YDR113C)    | O          | ×             | ×             |
| RFA3(YJL173C)-RAD54(YGL163C)   | O          | ×             | ×             |
| RFA3(YJL173C)-POL2(YNL262W)    | O          | ×             | ×             |
| RFA3(YJL173C)-HPR5(YJL092W)    | O          | ×             | ×             |
| RFA3(YJL173C)-CLB5(YPR120C)    | O          | ×             | ×             |
| PDS1(YDR113C)-CLB6(YGR109C)    | O          | ×             | ×             |
| PDS1(YDR113C)-RAD53(YPL153C)   | O          | ×             | ×             |
| PDS1(YDR113C)-MSH6(YDR097C)    | O          | ×             | ×             |
| PDS1(YDR113C)-CDC45(YLR103C)   | O          | ×             | ×             |
| PDS1(YDR113C)-PMS1(YNL082W)    | O          | ×             | ×             |
| PDS1(YDR113C)-RAD54(YGL163C)   | O          | ×             | ×             |
| PDS1(YDR113C)-POL2(YNL262W)    | O          | ×             | ×             |
| PDS1(YDR113C)-HPR5(YJL092W)    | O          | ×             | ×             |
| PDS1(YDR113C)-CLB5(YPR120C)    | O          | ×             | ×             |
| RAD54(YGL163C)-CLB6(YGR109C)   | O          | ×             | ×             |
| RAD54(YGL163C)-RAD53(YPL153C)  | O          | ×             | ×             |
| RAD54(YGL163C)-MSH6(YDR097C)   | O          | ×             | ×             |
| RAD54(YGL163C)-CDC45(YLR103C)  | O          | ×             | ×             |
| RAD54(YGL163C)-PMS1(YNL082W)   | O          | ×             | ×             |
| RAD54(YGL163C)-POL2(YNL262W)   | O          | ×             | O             |
| RAD54(YGL163C)-HPR5(YJL092W)   | O          | ×             | ×             |
| RAD54(YGL163C)-CLB5(YPR120C)   | O          | ×             | ×             |
| MSH6(YDR097C)-CLB6(YGR109C)    | O          | ×             | ×             |
| MSH6(YDR097C)-RAD53(YPL153C)   | O          | ×             | ×             |
| MSH6(YDR097C)-CDC45(YLR103C)   | O          | ×             | O             |
| MSH6(YDR097C)-PMS1(YNL082W)    | O          | ×             | ×             |
| MSH6(YDR097C)-POL2(YNL262W)    | O          | ×             | O             |

| Interacting genes (locus name) | Our Method | PathwayAssist | Chen's method |
|--------------------------------|------------|---------------|---------------|
| MSH6(YDR097C)-HPR5(YJL092W)    | O          | ×             | ×             |
| MSH6(YDR097C)-CLB5(YPR120C)    | O          | ×             | ×             |
| CDC45(YLR103C)-CLB6(YGR109C)   | O          | ×             | ×             |
| CDC45(YLR103C)-RAD53(YPL153C)  | O          | ×             | O             |
| CDC45(YLR103C)-PMS1(YNL082W)   | O          | ×             | ×             |
| CDC45(YLR103C)-POL2(YNL262W)   | O          | ×             | ×             |
| CDC45(YLR103C)-HPR5(YJL092W)   | O          | ×             | ×             |
| CDC45(YLR103C)-CLB5(YPR120C)   | O          | ×             | ×             |
| POL2(YNL262W)-CLB6(YGR109C)    | O          | ×             | ×             |
| POL2(YNL262W)-RAD53(YPL153C)   | O          | ×             | ×             |
| POL2(YNL262W)-PMS1(YNL082W)    | O          | ×             | ×             |
| POL2(YNL262W)-HPR5(YJL092W)    | O          | ×             | ×             |
| POL2(YNL262W)-CLB5(YPR120C)    | O          | ×             | ×             |
| RAD53(YPL153C)-CLB6(YGR109C)   | O          | ×             | ×             |
| RAD53(YPL153C)-PMS1(YNL082W)   | O          | ×             | O             |
| RAD53(YPL153C)-HPR5(YJL092W)   | O          | ×             | ×             |
| RAD53(YPL153C)-CLB5(YPR120C)   | O          | ×             | O             |
| HPR5(YJL092W)-CLB6(YGR109C)    | O          | ×             | ×             |
| HPR5(YJL092W)-PMS1(YNL082W)    | O          | ×             | ×             |
| HPR5(YJL092W)-CLB5(YPR120C)    | O          | ×             | O             |
| CLB5(YPR120C)-CLB6(YGR109C)    | O          | O             | O             |
| CLB5(YPR120C)-PMS1(YNL082W)    | O          | ×             | ×             |
| PMS1(YNL082W)-CLB6(YGR109C)    | O          | ×             | ×             |
